# Supplementary material for: Efficacy and safety of esketamine hydrochloride adjunct to sufentanil in non-surgical patients under mechanical ventilation in the ICU (SENSATION trial): protocol for a multicentre, single-blind, randomised controlled trial
Source: HighWire-hosted journal article supplement (doi:10.1136/bmjopen-2024-084469), 2024-09-01
Supplement: bmjopen-2024-084469supp001_data_supplement.pdf [file bmjopen-2024-084469supp001_data_supplement.pdf]

Supplementary Table S1: SPIRIT 2013 Checklist

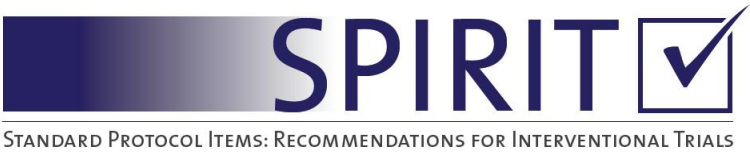

SPIRIT 2013 Checklist: Recommended items to address in a clinical trial protocol and related documents\*

| Section/item               | ItemNo | Description                                                                                                                                                                                                                                                                              | page/line numbers                            |
|----------------------------|--------|------------------------------------------------------------------------------------------------------------------------------------------------------------------------------------------------------------------------------------------------------------------------------------------|----------------------------------------------|
| Administrative information |        |                                                                                                                                                                                                                                                                                          |                                              |
| Title                      | 1      | Descriptive title identifying the study design, population, interventions, and, if applicable, trial acronym                                                                                                                                                                             | P1/Line1-4                                   |
| Trial registration         | 2a     | Trial identifier and registry name. If not yet registered, name of intended registry                                                                                                                                                                                                     | P3/Line43-44                                 |
|                            | 2b     | All items from the World Health Organization Trial Registration Data Set                                                                                                                                                                                                                 | Not applicable                               |
| Protocol version           | 3      | Date and version identifier                                                                                                                                                                                                                                                              | P6/Line 95-96                                |
| Funding                    | 4      | Sources and types of financial, material, and other support                                                                                                                                                                                                                              | P22/Line394-398                              |
| Roles and responsibilities | 5a     | Names, affiliations, and roles of protocol contributors                                                                                                                                                                                                                                  | P1/Line5-17 and P21/Line378-383              |
|                            | 5b     | Name and contact information for the trial sponsor                                                                                                                                                                                                                                       | P1/Line5-8 and the registration information. |
|                            | 5c     | Role of study sponsor and funders, if any, in study design; collection, management, analysis, and interpretation of data; writing of the report; and the decision to submit the report for publication, including whether they will have ultimate authority over any of these activities | P22/Line395-399                              |
|                            | 5d     | Composition, roles, and responsibilities of the coordinating centre, steering committee, endpoint adjudication committee, data management team, and other individuals or groups overseeing the trial, if applicable (see Item 21a for data monitoring committee)                         | Detail in aggrement                          |
| Introduction               |        |                                                                                                                                                                                                                                                                                          |                                              |
| Background and rationale   | 6a     | Description of research question and justification for undertaking the trial, including summary of relevant studies (published and unpublished) examining benefits and harms for each intervention                                                                                       | P5/Line60-P6/Lline90                         |
|                            | 6b     | Explanation for choice of comparators                                                                                                                                                                                                                                                    | P5/Line68-76<br>And<br>P18 Line319-321       |
| Objectives                 | 7      | Specific objectives or hypotheses                                                                                                                                                                                                                                                        | P6/Line87-90                                 |

|                                                           |     |                                                                                                                                                                                                                                                                                                                                                                                |                         |
|-----------------------------------------------------------|-----|--------------------------------------------------------------------------------------------------------------------------------------------------------------------------------------------------------------------------------------------------------------------------------------------------------------------------------------------------------------------------------|-------------------------|
| Trial design                                              | 8   | Description of trial design including type of trial (eg, parallel group, crossover, factorial, single group), allocation ratio, and framework (eg, superiority, equivalence, noninferiority, exploratory)                                                                                                                                                                      | P6/Line93-96            |
| <b>Methods: Participants, interventions, and outcomes</b> |     |                                                                                                                                                                                                                                                                                                                                                                                |                         |
| Study setting                                             | 9   | Description of study settings (eg, community clinic, academic hospital) and list of countries where data will be collected.<br>Reference to where list of study sites can be obtained                                                                                                                                                                                          | P6/Line98-P7/Line101    |
| Eligibility criteria                                      | 10  | Inclusion and exclusion criteria for participants. If applicable, eligibility criteria for study centres and individuals who will perform the interventions (eg, surgeons, psychotherapists)                                                                                                                                                                                   | P7/Line104-P8/Line131   |
| Interventions                                             | 11a | Interventions for each group with and sufficient detail to allow replication, including how when they will be administered                                                                                                                                                                                                                                                     | P10/L158-P11/Line193    |
|                                                           | 11b | Criteria for discontinuing or modifying allocated interventions for a given trial participant (eg, drug dose change in response to harms, participant request, or improving/worsening disease)                                                                                                                                                                                 | P11/Line185-194         |
|                                                           | 11c | Strategies to improve adherence to intervention protocols, and any procedures for monitoring adherence (eg, drug tablet return, laboratory tests)                                                                                                                                                                                                                              | Not applicable          |
|                                                           | 11d | Relevant concomitant care and interventions that are permitted or prohibited during the trial                                                                                                                                                                                                                                                                                  | P12/Line194-P13/Line218 |
| Outcomes                                                  | 12  | Primary, secondary, and other outcomes, including the specific measurement variable (eg, systolic blood pressure), analysis metric (eg, change from baseline, final value, time to event), method of aggregation (eg, median, proportion), and time point for each outcome. Explanation of the clinical relevance of chosen efficacy and harm outcomes is strongly recommended | P14/L233-P15/L258       |
| Participant timeline                                      | 13  | Time schedule of enrolment, interventions (including any run-ins and washouts), assessments, and visits for participants. A schematic diagram is highly recommended (see Figure)                                                                                                                                                                                               | Supplementary Table S3  |
| Sample size                                               | 14  | Estimated number of participants needed to achieve study objectives and how it was determined, including clinical and statistical assumptions supporting any sample size calculations                                                                                                                                                                                          | P15/Line271-P16/Line284 |
| Recruitment                                               | 15  | Strategies for achieving adequate participant enrolment to reach target sample size                                                                                                                                                                                                                                                                                            | P9/Line133-138          |

**Methods: Assignment of interventions (for controlled trials)**

Allocation:

|                                                           |     |                                                                                                                                                                                                                                                                                                                                                                                                              |                                                         |
|-----------------------------------------------------------|-----|--------------------------------------------------------------------------------------------------------------------------------------------------------------------------------------------------------------------------------------------------------------------------------------------------------------------------------------------------------------------------------------------------------------|---------------------------------------------------------|
| Sequence generation                                       | 16a | Method of generating the allocation sequence (eg, computer-generated random numbers), and list of any factors for stratification. To reduce predictability of a random sequence, details of any planned restriction (eg, blocking) should be provided in a separate document that is unavailable to those who enrol participants or assign interventions                                                     | P9/Line142-144                                          |
| Allocation concealment mechanism                          | 16b | Mechanism of implementing the allocation sequence (eg, central telephone; sequentially numbered, opaque, sealed envelopes), describing any steps to conceal the sequence until interventions are assigned                                                                                                                                                                                                    | P9/Line143-149                                          |
| Implementation                                            | 16c | Who will generate the allocation sequence, who will enrol participants, and who will assign participants to interventions                                                                                                                                                                                                                                                                                    | P9/Line144-149                                          |
| Blinding (masking)                                        | 17a | Who will be blinded after assignment to interventions (eg, trial participants, care providers, outcome assessors, data analysts), and how                                                                                                                                                                                                                                                                    | P9/Line151-P10/156                                      |
|                                                           | 17b | If blinded, circumstances under which unblinding is permissible, and procedure for revealing a participant's allocated intervention during the trial                                                                                                                                                                                                                                                         | Not applicable                                          |
| <b>Methods: Data collection, management, and analysis</b> |     |                                                                                                                                                                                                                                                                                                                                                                                                              |                                                         |
| Data collection methods                                   | 18a | Plans for assessment and collection of outcome, baseline, and other trial data, including any related processes to promote data quality (eg, duplicate measurements, training of assessors) and a description of study instruments (eg, questionnaires, laboratory tests) along with their reliability and validity, if known. Reference to where data collection forms can be found, if not in the protocol | P13/Line 224-231<br>And<br>The handbook for researchers |
|                                                           | 18b | Plans to promote participant retention and complete follow-up, including list of any outcome data to be collected for participants who discontinue or deviate from intervention protocols                                                                                                                                                                                                                    | P13/Line 220-222                                        |
| Data management                                           | 19  | Plans for data entry, coding, security, and storage, including any related processes to promote data quality (eg, double data entry; range checks for data values). Reference to where details of data management procedures can be found, if not in the protocol                                                                                                                                            | P13/Line225-231<br>And<br>The handbook for researchers  |
| Statistical methods                                       | 20a | Statistical methods for analysing primary and secondary outcomes. Reference to where other details of the statistical analysis plan can be found, if not in the protocol                                                                                                                                                                                                                                     | P16/Line286-P17/Line312                                 |
|                                                           | 20b | Methods for any additional analyses (eg, subgroup and adjusted analyses)                                                                                                                                                                                                                                                                                                                                     | P17/Line296-310                                         |
|                                                           | 20c | Definition of analysis population relating to protocol non-adherence (eg, as randomised analysis), and any statistical methods to handle missing data (eg, multiple imputation)                                                                                                                                                                                                                              | P16/Line286-288                                         |

**Methods: Monitoring**

|                 |     |                                                                                                                                                                                                                                                                                                                                       |                      |
|-----------------|-----|---------------------------------------------------------------------------------------------------------------------------------------------------------------------------------------------------------------------------------------------------------------------------------------------------------------------------------------|----------------------|
| Data monitoring | 21a | Composition of data monitoring committee (DMC); summary of its role and reporting structure; statement of whether it is independent from the sponsor and competing interests; and reference to where further details about its charter can be found, if not in the protocol. Alternatively, an explanation of why a DMC is not needed | P15/Line267-269      |
|                 | 21b | Description of any interim analyses and stopping guidelines, including who will have access to these interim results and make the final decision to terminate the trial                                                                                                                                                               | P17/Line310-312      |
| Harms           | 22  | Plans for collecting, assessing, reporting, and managing solicited and spontaneously reported adverse events and other unintended effects of trial interventions or trial conduct                                                                                                                                                     | From P15/Line260-269 |
| Auditing        | 23  | Frequency and procedures for auditing trial conduct, if any, and whether the process will be independent from investigators and the sponsor                                                                                                                                                                                           | Not applicable       |

**Ethics and dissemination**

|                               |     |                                                                                                                                                                                                                                  |                     |
|-------------------------------|-----|----------------------------------------------------------------------------------------------------------------------------------------------------------------------------------------------------------------------------------|---------------------|
| Research ethics approval      | 24  | Plans for seeking research ethics committee/institutional review board (REC/IRB) approval                                                                                                                                        | P21/Line390-393     |
| Protocol amendments           | 25  | Plans for communicating important protocol modifications (eg, changes to eligibility criteria, outcomes, analyses) to relevant parties (eg, investigators, REC/IRBs, trial participants, trial registries, journals, regulators) | Not applicable      |
| Consent or assent             | 26a | Who will obtain informed consent or assent from potential trial participants or authorised surrogates, and how (see Item 32)                                                                                                     | P9/Line133-139      |
|                               | 26b | Additional consent provisions for collection and use of participant data and biological specimens in ancillary studies, if applicable                                                                                            | Detail in the ICF   |
| Confidentiality               | 27  | How personal information about potential and enrolled participants will be collected, shared, and maintained in order to protect confidentiality before, during, and after the trial                                             | Detail in the ICF   |
| Declaration of interests      | 28  | Financial and other competing interests for principal investigators for the overall trial and each study site                                                                                                                    | P21/Line385-388     |
| Access to data                | 29  | Statement of who will have access to the final trial dataset, and disclosure of contractual agreements that limit such access for investigators                                                                                  | Detail in agreement |
| Ancillary and post-trial care | 30  | Provisions, if any, for ancillary and post-trial care, and for compensation to those who suffer harm from trial participation                                                                                                    | Detail in the ICF   |

|                            |     |                                                                                                                                                                                                                                                                                     |                            |
|----------------------------|-----|-------------------------------------------------------------------------------------------------------------------------------------------------------------------------------------------------------------------------------------------------------------------------------------|----------------------------|
| Dissemination policy       | 31a | Plans for investigators and sponsor to communicate trial results to participants, healthcare professionals, the public, and other relevant groups (eg, via publication, reporting in results databases, or other data sharing arrangements), including any publication restrictions | P21/L392-393               |
|                            | 31b | Authorship eligibility guidelines and any intended use of professional writers                                                                                                                                                                                                      | Not applicable             |
|                            | 31c | Plans, if any, for granting public access to the full protocol, participant-level dataset, and statistical code                                                                                                                                                                     | Not applicable             |
| <b>Appendices</b>          |     |                                                                                                                                                                                                                                                                                     |                            |
| Informed consent materials | 32  | Model consent form and other related documentation given to participants and authorised surrogates                                                                                                                                                                                  | Supplementary document-ICF |
| Biological specimens       | 33  | Plans for collection, laboratory evaluation, and storage of biological specimens for genetic or molecular analysis in the current trial and for future use in ancillary studies, if applicable                                                                                      | Not applicable             |

\*It is strongly recommended that this checklist be read in conjunction with the SPIRIT 2013 Explanation & Elaboration for important clarification on the items. Amendments to the protocol should be tracked and dated. The SPIRIT checklist is copyrighted by the SPIRIT Group under the Creative Commons “[Attribution-NonCommercial-NoDerivs 3.0 Unported](#)” license.

Supplementary Table S2: Criteria for discontinuation of esketamine hydrochloride

| Event                                                                                                 | Discontinuation criteria and management (esketamine hydrochloride)                                                                                                     | Data processing                                  |
|-------------------------------------------------------------------------------------------------------|------------------------------------------------------------------------------------------------------------------------------------------------------------------------|--------------------------------------------------|
| 72 hours after randomization                                                                          | Stop esketamine hydrochloride infusion                                                                                                                                 | Follow up, data will be included in the analysis |
| Patient or family member withdraw the informed consent                                                | Stop esketamine hydrochloride infusion                                                                                                                                 | Follow up, data will be included in the analysis |
| Patient died                                                                                          | Stop esketamine hydrochloride infusion                                                                                                                                 | Data will be included in the analysis            |
| Analgesics are not required due to extubation or other medical reasons                                | Stop esketamine hydrochloride infusion                                                                                                                                 | Follow up, data will be included in the analysis |
| Require deep sedation or neuromuscular blockers                                                       | Stop esketamine hydrochloride infusion                                                                                                                                 | Follow up, data will be included in the analysis |
| Severe heart failure (EF<30%), cardiogenic shock or acute myocardial infarction                       | Stop esketamine hydrochloride infusion, adverse event needs to be reported in detail and recorded in the Electronic Data Collection System (EDC)                       | Follow up, data will be included in the analysis |
| Acute liver failure                                                                                   | Stop esketamine hydrochloride infusion, adverse event needs to be reported in detail and recorded in the EDC                                                           | Follow up, data will be included in the analysis |
| Renal dysfunction that probably caused by esketamine                                                  | Stop esketamine hydrochloride infusion, adverse event needs to be reported in detail and recorded in the EDC                                                           | Follow up, data will be included in the analysis |
| Require Surgery or tracheotomy                                                                        | Stop esketamine hydrochloride infusion                                                                                                                                 | Follow up, data will be included in the analysis |
| Unable to accurately assess CPOT and RASS score                                                       | Stop esketamine hydrochloride infusion                                                                                                                                 | Follow up, data will be included in the analysis |
| Uncontrolled agitation (pulling off artificial airway, tubes or lines and combative behavior)         | If it is related to esketamine hydrochloride, the infusion stops; if not, the infusion continues. Adverse event needs to be reported in detail and recorded in the EDC | Follow up, data will be included in the analysis |
| Uncontrollable hypertension (SBP≥180mmHg, DBP ≥100mmHg) lasting more than 3 hours                     |                                                                                                                                                                        |                                                  |
| Other sever adverse events that the treating team believes may be related to esketamine hydrochloride | Stop esketamine hydrochloride infusion, the adverse event needs to be reported in detail and recorded in the EDC                                                       | Follow up, data will be included in the analysis |

*Esketamine hydrochloride infusion should be discontinued when any of the events listed in the table occur, whichever occurs first, but patient follow-up should continue.*

Supplementary Table S3 : Study schedule

| Time point                                                            | -D1 | D0 | D1 | D2 | D3 | D4 | D5 | D6 | D7 | D... | D28 |
|-----------------------------------------------------------------------|-----|----|----|----|----|----|----|----|----|------|-----|
| <b>Enrolment</b>                                                      |     |    |    |    |    |    |    |    |    |      |     |
| Eligibility screen                                                    | ×   |    |    |    |    |    |    |    |    |      |     |
| Informed consent                                                      | ×   |    |    |    |    |    |    |    |    |      |     |
| Allocation                                                            |     | ×  |    |    |    |    |    |    |    |      |     |
| <b>Intervention</b>                                                   |     |    |    |    |    |    |    |    |    |      |     |
| Intervention of the standard care group                               |     | ×  | ×  | ×  | ×  |    |    |    |    |      |     |
| Intervention of S-ketamine group                                      |     | ×  | ×  | ×  | ×  |    |    |    |    |      |     |
| <b>Assessment</b>                                                     |     |    |    |    |    |    |    |    |    |      |     |
| Baseline demographics                                                 | ×   |    |    |    |    |    |    |    |    |      |     |
| Diagnosis                                                             | ×   |    |    |    |    |    |    |    |    |      |     |
| Comorbidity                                                           | ×   |    |    |    |    |    |    |    |    |      |     |
| Mechanically ventilation duration before randomization                |     | ×  |    |    |    |    |    |    |    |      |     |
| Cumulative dose of sufentanil before randomization                    |     | ×  |    |    |    |    |    |    |    |      |     |
| SOFA score                                                            |     | ×  | ×  | ×  | ×  | ×  | ×  | ×  | ×  |      |     |
| APACHE- II score                                                      |     | ×  |    |    |    |    |    |    | ×  |      |     |
| AGI and enteral nutritional tolerance score (daily)                   |     | ×  | ×  | ×  | ×  | ×  | ×  | ×  | ×  |      |     |
| Gastric residual volume and intra-abdominal pressure (every 12 hours) |     | ×  | ×  | ×  | ×  | ×  | ×  | ×  | ×  |      |     |
| Liver function, renal function, and myocardial enzymes                |     | ×  | ×  | ×  | ×  |    |    |    | ×  |      |     |
| RASS and CPOT (every 4 h)                                             |     | ×  | ×  | ×  | ×  |    |    |    |    |      |     |
| Cumulative dose of sufentanil                                         |     | ×  | ×  | ×  | ×  |    | ×  |    |    |      |     |
| Cumulative duration of sufentanil                                     |     | ×  | ×  | ×  | ×  |    | ×  |    |    |      |     |
| Cumulative dose of esketamine hydrochloride                           |     | ×  | ×  | ×  | ×  |    |    |    |    |      |     |
| Cumulative duration of esketamine hydrochloride                       |     | ×  | ×  | ×  | ×  |    |    |    |    |      |     |
| Cumulative dose of propofol, midazolam and dexmedetomidine            |     | ×  | ×  | ×  | ×  |    |    |    |    |      |     |

|                                                                                         |  |   |   |   |   |   |   |   |   |   |   |
|-----------------------------------------------------------------------------------------|--|---|---|---|---|---|---|---|---|---|---|
| Cumulative duration of propofol, midazolam and dexmedetomidine                          |  | × | × | × | × |   |   |   |   |   |   |
| Require for frequent suctioning                                                         |  |   | × | × | × |   |   |   |   |   |   |
| Uncontrolled agitation                                                                  |  |   | × | × | × |   |   |   |   |   |   |
| Nutrition implementation                                                                |  |   |   |   |   | × |   |   | × |   |   |
| CAM-ICU and psychotropic drugs used for delirium                                        |  |   | × | × | × | × | × | × | × | × | × |
| Adverse events, severe adverse events and adverse events that may related to study drug |  |   | × | × | × | × | × | × | × | × | × |
| Ventilation free day                                                                    |  |   | × | × | × | × | × | × | × | × | × |
| Vasopressor free days                                                                   |  |   | × | × | × | × | × | × | × | × | × |
| Length of ICU stay                                                                      |  |   | × | × | × | × | × | × | × | × | × |
| Length of hospital stay                                                                 |  |   | × | × | × | × | × | × | × | × | × |
| 28-day mortality rate after randomization                                               |  |   | × | × | × | × | × | × | × | × | × |
